# Supplementary material for: Structure of SALO, a leishmaniasis vaccine candidate from the sand fly Lutzomyia longipalpis
Source: PubMed Central journal article supplement (PMC5344329; doi:10.1371/journal.pntd.0005374), 2017-03-09
Supplement: pntd.0005374.s002.pdf [file pntd.0005374.s002.pdf]

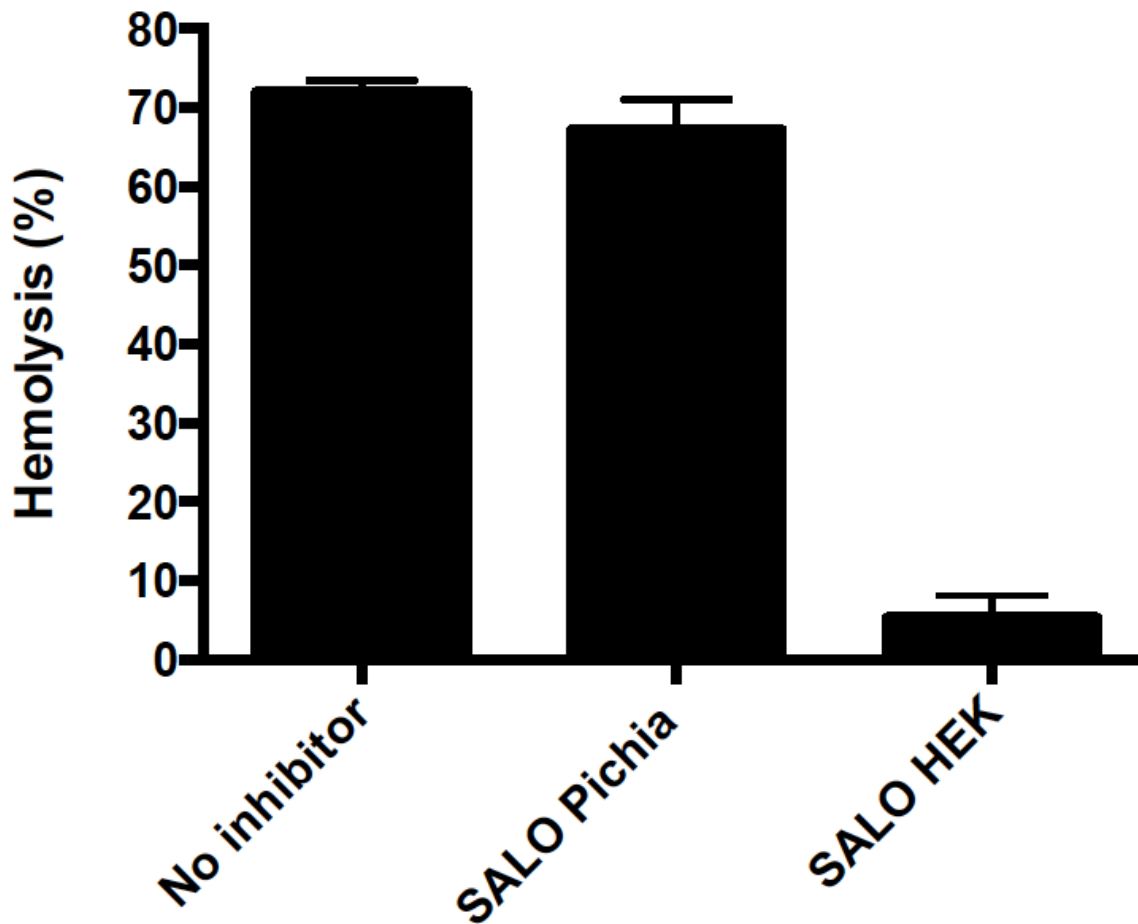

**S1 Fig. Recombinant SALO produced in *Pichia pastoris* (rSALO[P]) does not inhibit the classical pathway of complement.** rSALO (0.1 $\mu$ M) produced in Pichia (SALO Pichia) or rSALO (0.1 $\mu$ M) produced in HEK cells (SALO HEK) were tested on the classical pathway of complement using a hemolytic assay. Erythrocyte lysis was measured at 414nm. The data represents the mean plus the standard deviation of three independent experiments.
