# Supplementary material for: Structure of SALO, a leishmaniasis vaccine candidate from the sand fly Lutzomyia longipalpis
Source: PubMed Central journal article supplement (PMC5344329; doi:10.1371/journal.pntd.0005374), 2017-03-09
Supplement: pntd.0005374.s003.pdf [file pntd.0005374.s003.pdf]

A

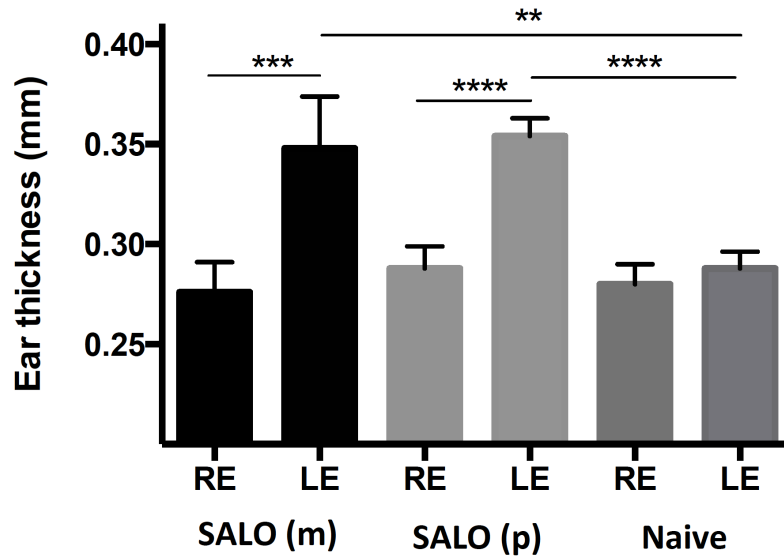

B

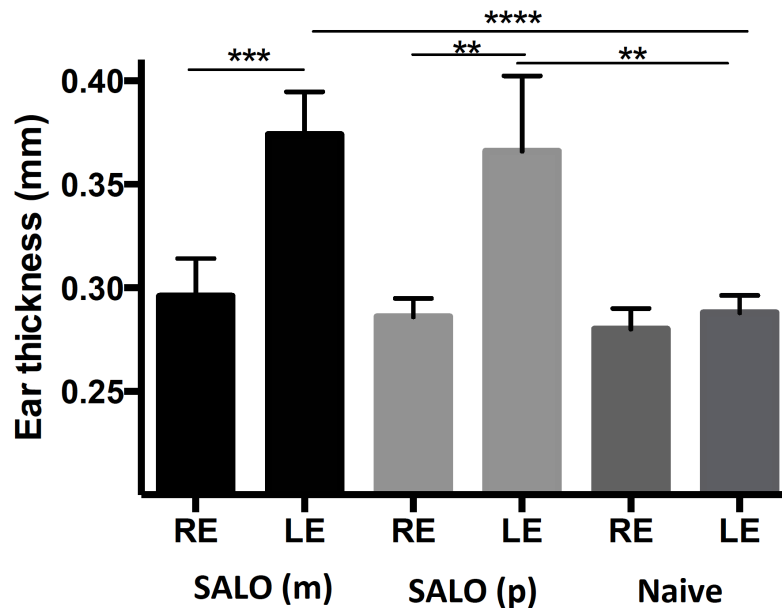

**S2 Fig. Skin immune response in rSALO immunized mice.** C57bl/6 mice were immunized in the ear with 2  $\mu$ g of recombinant SALO produced in *P. pastoris* (p) or SALO produced in HEK cells (m). Two weeks (A) or 4 weeks (B) after the last immunization 2  $\mu$ g of recombinant protein was injected and induration and redness in the ear was measured at 48 hours. Naïve mice (control) were injected with PBS. The data represents the mean  $\pm$  standard deviation of a representative experiment with 5 mice per group of two independent experiments (ANOVA and Tukey test).
